# Supplementary material for: Automatic transwell assay by an EIS cell chip to monitor cell migration
Source: Royal Society of Chemistry journal article supplement (doi:10.1039/c1lc20540d), 2011-01-01
Supplement: c1lc20540d.pdf [file c1lc20540d.pdf]

# Automatic transwell assay by an EIS cell chip to monitor cell migration

*Elisabetta Primiceri*<sup>\*a,b</sup>, *Maria Serena Chiriaco*<sup>a,b</sup>, *Francesca Dioguardi*<sup>a</sup>, *Anna Grazia Monteduro*<sup>a,c</sup>,  
*Eliana D'Amone*<sup>a</sup>, *Ross Rinaldi*<sup>a,c</sup>, *Gianluigi Giannelli*<sup>d</sup>, *Giuseppe Maruccio*<sup>\*a,e</sup>

<sup>a</sup> NNL CNR-Istituto Nanoscienze, Via per Arnesano, Lecce, Italy. <sup>b</sup> Scuola Superiore ISUFI, Univ. of Salento, Via per Arnesano, Lecce, Italy. <sup>c</sup> Dept. of Innovation Engineering, University of Salento, Via per Arnesano, Lecce, Italy. <sup>d</sup> Department of Internal Medicine, Immunology, and Infectious Diseases, Section of Internal Medicine, University of Bari Medical School, Bari, Italy. <sup>e</sup> Dept. of Physics, University of Salento, Via per Arnesano, Lecce, Italy. \*Correspondence should be addressed to Elisabetta Primiceri ([elisabetta.primiceri@unisalento.it](mailto:elisabetta.primiceri@unisalento.it)) or Giuseppe Maruccio ([giuseppe.maruccio@unisalento.it](mailto:giuseppe.maruccio@unisalento.it)).

## Supplementary Materials

**Membrane functionalization.** To investigate membrane functionalization, Laminin 1 (Ln-1) was functionalized with fluorescein isothiocyanate (FICT). Specifically, 2.8 mg of FITC were dissolved in 1 ml of Dimethyl sulfoxide (DMSO) and then Ln-1 was added to a final concentration of 40 µg/ml and incubated 24h. Unreacted FITC molecules were removed by dialysis with a membrane with a molecular weight cut-off (MWCO) of 12-14 kDa. An additional purification step was performed by sephadex coloumn G25 in ammoniac buffer pH 8.5. The Ln1-FITC solution (about 10 µg/ml) was then injected in the device and incubated for 2 hour at room temperature, then the devices were washed in PBS 1X-TWEEN 0.2% for 10 minutes and dried under nitrogen flow. Finally, the membrane was removed from the device and analyzed through confocal microscopy. In **Supplementary Fig. 1**, superimposed optical and fluorescent images of membrane bottom side and cross sections are reported to show that the membrane was functionalized through its whole thickness.

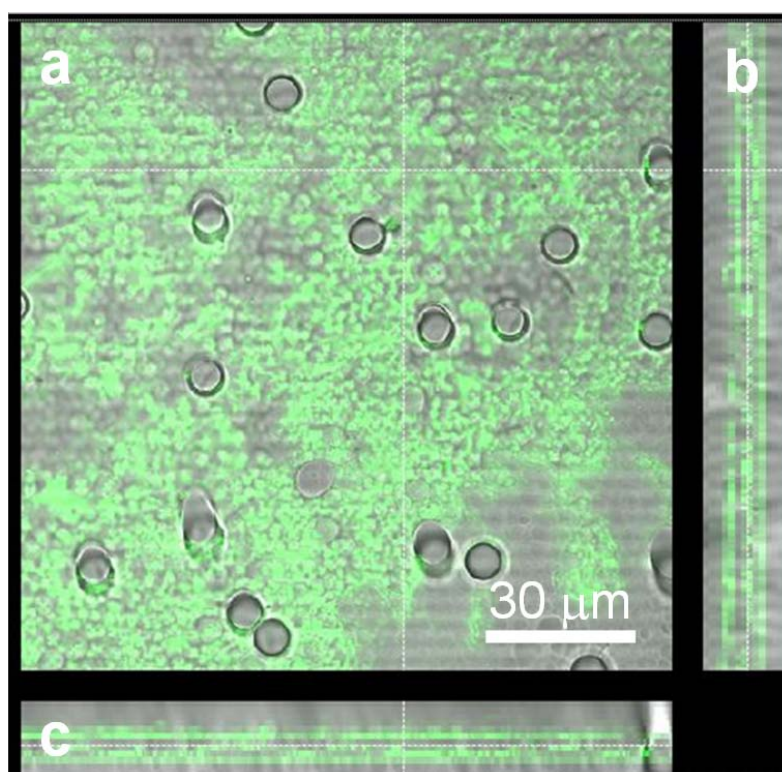

**Supplementary Figure 1:** membrane functionalization. (a) Superimposed optical and fluorescent images of membrane bottom side and (b-c) cross sections.

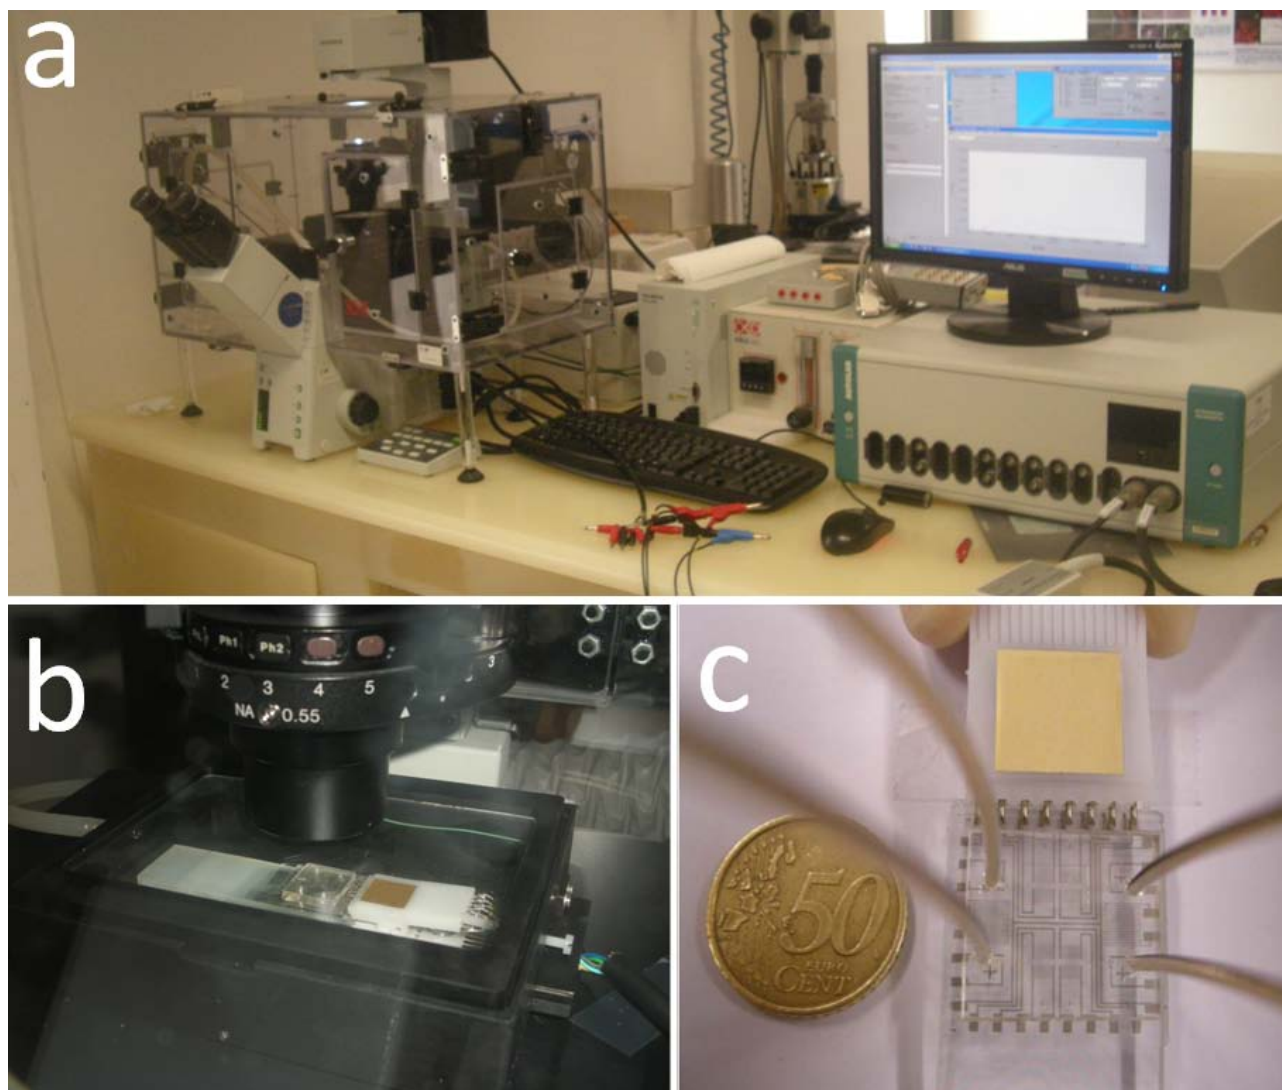

**Supplementary Figure 2:** (a) View of the experimental set up used for EIS measurements composed of an impedance analyzer Autolab PGSTAT30 (EcoChemie) with a FRA2 and an incubator (OKO Lab) integrated on an inverted microscope (Olympus) to control the external environmental conditions (37° C in 5% CO<sub>2</sub>). (b) Detail of the experimental setup. The chips are electrically connected by a compatible clamp. (c) Front view of a device connected by a clamp.
